# Supplementary material for: ADMET and Solubility Analysis of New 5-Nitroisatine-Based Inhibitors of CDK2 Enzymes
Source: MDPI journal article supplement (doi:10.3390/biomedicines11113019), 2023-11-10
Supplement: s1 [file s1]

# ADMET and Solubility Analysis of New 5-Nitroisatine-Based Inhibitors of CDK2 Enzymes

Przemysław Czeleń <sup>1,\*</sup>, Tomasz Jeliński <sup>1</sup>, Agnieszka Skotnicka <sup>2</sup>, Beata Szeffler <sup>1</sup> and Kamil Szupryczyński <sup>3</sup>

<sup>1</sup> Department of Physical Chemistry, Faculty of Pharmacy, Collegium Medicum, Nicolaus Copernicus

University, Kurpińskiego 5, 85-096 Bydgoszcz, Poland; tomasz.jelinski@cm.umk.pl (T.J.); beatas@cm.umk.pl (B.S.)

<sup>2</sup> Faculty of Chemical Technology and Engineering, Bydgoszcz University of Science and Technology,

Seminaryjna 3, 85-326 Bydgoszcz, Poland; askot@pbs.edu.pl

<sup>3</sup> Doctoral School of Medical and Health Sciences, Faculty of Pharmacy, Collegium Medicum, Nicolaus Copernicus University, Kurpińskiego 5, 85-096 Bydgoszcz, Poland; kamilekszapryk@gmail.com

\* Correspondence: przemekcz@cm.umk.pl

## Supplementary materials

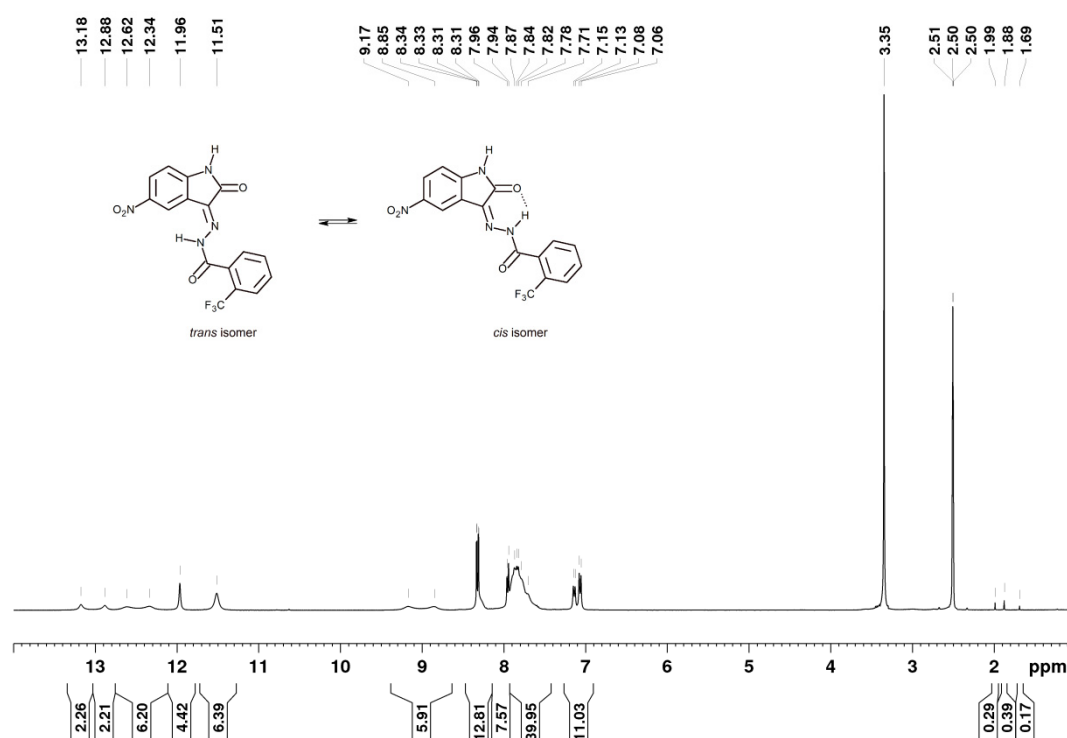

Figure s1. The <sup>1</sup>H NMR spectrum (400 MHz) of 2-trifluoromethyl-*N'*-[5-nitro-2-oxo-1,2-dihydro-3*H*-indol-3-ylidene]benzohydrazide (1) in DMSO-d<sub>6</sub>.

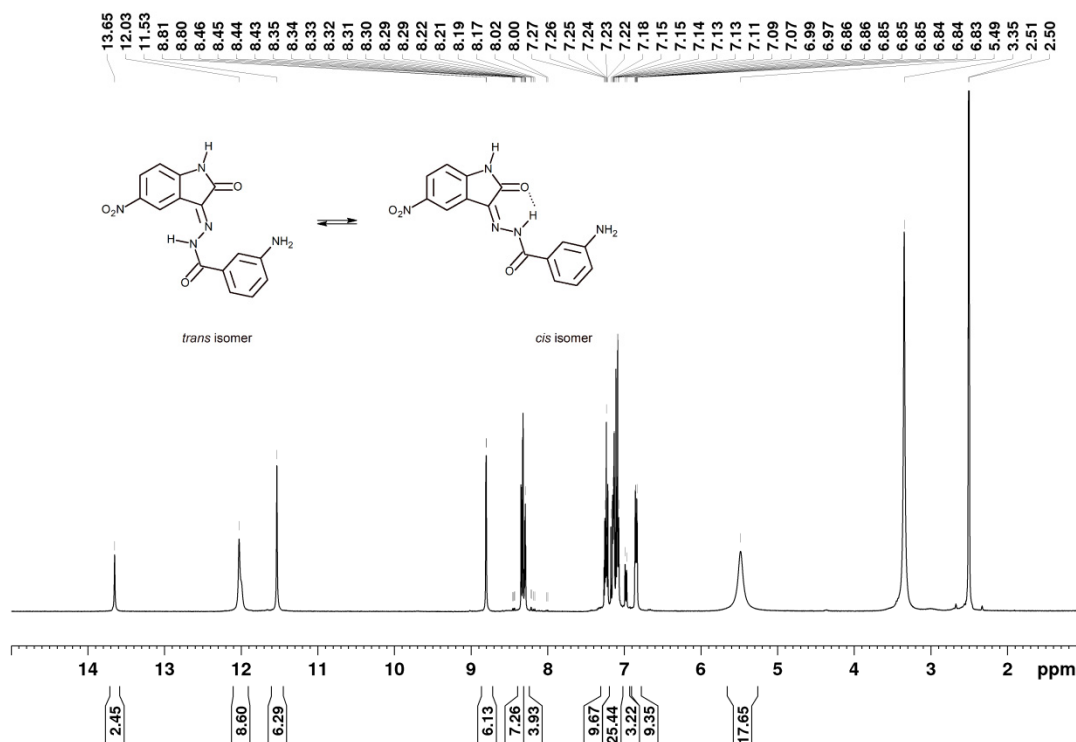

Figure s2. The  $^1\text{H}$  NMR spectrum (400 MHz) of 3-Amino-*N'*-[5-nitro-2-oxo-1,2-dihydro-3*H*-indol-3-ylidene]benzohydrazide (2) in  $\text{DMSO-d}_6$ .

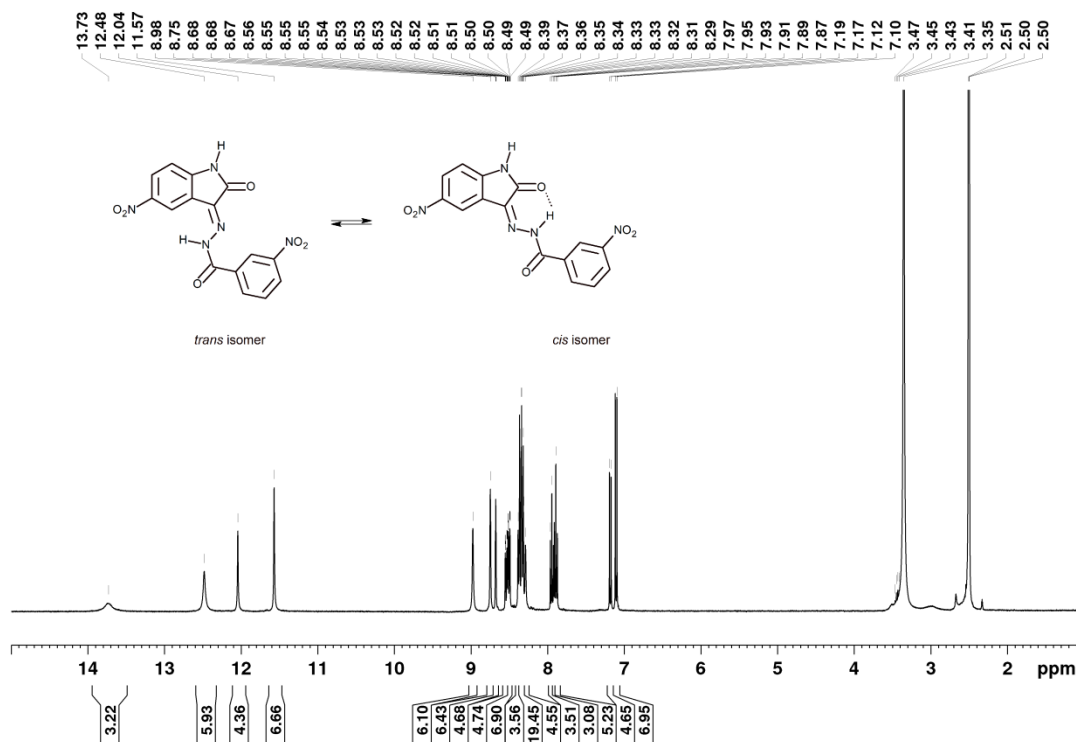

Figure s3. The  $^1\text{H}$  NMR spectrum (400 MHz) of 3-nitro-*N'*-[5-nitro-2-oxo-1,2-dihydro-3*H*-indol-3-ylidene]benzohydrazide (3) in  $\text{DMSO-d}_6$ .
